# Supplementary material for: Metabolic Engineering for Efficient Synthesis of Patchoulol in Saccharomyces cerevisiae
Source: MDPI journal article supplement (doi:10.3390/fermentation10040211), 2024-04-12
Supplement: s1 [file s1]

**Table S1. Primers Used in This Study**

| <b>Names</b>          | <b>Description</b>                         |
|-----------------------|--------------------------------------------|
| YMRW $\Delta$ 15-UP-F | CAATCAATCAAAGCAACCCACAAATCCTAG             |
| YMRW $\Delta$ 15-UP-R | ATCCTCGAGGAGAACTTCTAGTATATACTGTATACC       |
| YMRW $\Delta$ 15-D-F  | GGGATGTGAGACATGTCAATTATAAGAAGTG            |
| YMRW $\Delta$ 15-D-R  | CCTCATGATGTGTTAGTTATACGTAAATCATGACTACC     |
| YMRW $\Delta$ 15-YZ-F | TTTTTCTGGATTTTCGGTTGCTGAACTAG              |
| YMRW $\Delta$ 15-YZ-R | AAAAGCGCAAACCTGACTGGTGTACTTTC              |
| P <sub>TEF1</sub> -F  | ATAGCTTCAAAATGTTTCTACTCCTTTTTTACTCTTCC     |
| P <sub>TEF1</sub> -R  | GAAAGCATAGCAATCTAATCTAAGTTTTCTAGAACTA      |
| P <sub>GAL1</sub> -F  | CGGATTAGAAGCCGCCGAG                        |
| P <sub>GAL1</sub> -R  | CCTCTATACTTTAACGTCAAGGAG                   |
| P <sub>GAL7</sub> -F  | GCAACACATAGATTTGCTGTATAACGA                |
| P <sub>GAL7</sub> -R  | ACAGTTGAATATTCCTCAAAAATGACTGC              |
| P <sub>CCW12</sub> -F | CTATTGGCGTCTGATTTCCGTTTTGG                 |
| P <sub>CCW12</sub> -R | CTTCTGTCATTTCGCTTAAACACTATATCAATA          |
| P <sub>PGK1</sub> -F  | GTTTGCAAAAAGAACAAAACCTGAAAAAACCCAG         |
| P <sub>PGK1</sub> -R  | GGAAGTAATTATCTACTTTTTACAACAAATATAAAACA     |
| P <sub>TDH3</sub> -F  | TCATTATCAATACTGCCATTTCAAAGAATACG           |
| P <sub>TDH3</sub> -R  | GAACTTAGTTTCGAATAAACACACATAAACAAACAAA      |
| PTS-F                 | ATGGAATTGTATGCTCAATCTGTTGGTG               |
| PTS-R                 | CCTGTTCCATATTATCCATATGATGTTCTGATTATGCTTAA  |
| T <sub>ADH1</sub> -F  | CCGAATTTCTTATGATTTATGATTT                  |
| T <sub>ADH1</sub> -R  | GCTCTTATTGACCACACCTCTACCGG                 |
| GAL80-UP-F            | TCAAGATACAGAACCTCCTCCAGATGGAATCCC          |
| GAL80-UP-R            | GACGGGAGTGGAAGAACGGGAAACC                  |
| GAL80-D-F             | AAGCATCTTGCCCTGTGCTT                       |
| GAL80-D-R             | CCATGCTACCTTCCATGGTTGAGC                   |
| GAL80-YZ-F            | GTGCCTCTATGATGGGTATGGCTTG                  |
| GAL80-YZ-R            | GCACCGCATTATTAGTATTCCTGGAGA                |
| pESC-F                | GGATCCGGGGTTTTTCTCCTTGAC                   |
| pESC-F                | GTCGACATGGAACAGAAGTTGATTTCCG               |
| HO-UP-F               | CGCGAAAATTCATGTCATGTCCACATTAAAC            |
| HO-UP-R               | CATAAGCAGCAATCAATTCTATCTATACTTTAAA         |
| HO-D-F                | AATGTGTATATTAGTTTAAAAAGTTGTATG             |
| HO-D-R                | CGTAGGATTCCAATCTTTGTCTAGCTTCGTGCTTCTTGGCAA |
| HO-YZ-F               | ATCCTACACAGGGCTTAAGGGCAAATG                |
| HO-YZ-R               | GACTTTTCGACGGCAGTAACCTTCAAG                |
| tHMG1-F               | ATGGCTGCAGACCAATTGGTGAAGACTGAAGTC          |
| tHMG1-R               | GATGGGTCCGTCACCTGCATTAAATCCTAA             |
| T <sub>CYC1</sub> -F  | ACAGGCCCTTTTCCTTTGTGCGATATCATGT            |
| T <sub>CYC1</sub> -R  | GGTTTTGGGACGCTCGAAGGCTTTAATTTGC            |
| PDC6-UP-F             | AGTGATAACCATTCTCTAAACAAAAGCCCATG           |
| PDC6-UP-R             | TAGCACAAGATTAAGATAGAATGGCTTCAAACAGC        |
| PDC6-D-F              | CGGTTCAAATTATACTAAATCTAAATACTACGTTATCGCC   |
| PDC6-D-R              | AAGGAAGGATGCAGAATGAGCACTTGTTATTTA          |
| PDC6-YZ-F             | ACGTACGGACCAATCGAAGTGTGTAA                 |
| PDC6-YZ-R             | TGTGCAGATGCAGATGTGAGACAAATTTT              |
| ERG20-F               | ATGGCTTCAGAAAAAGAAATTAGGAGAGAGAGATTC       |
| ERG20-R               | TTATTTACTTCTCTTGTAACCTTGTTCAAAAACGCAG      |
| T <sub>GPM1</sub> -F  | GAAATCATCAAATCATTCACTTTCAG                 |
| T <sub>GPM1</sub> -R  | GTTATTGCTATAACATGTCATGTCACCATTAATTACC      |
| IDI1-F                | ATGACTGCCGACAACAATAGTATGCCCC               |
| IDI1-R                | GACAGGCAAATTCATAGAATGCTATAA                |
| T <sub>ACT1</sub> -F  | TCTCTGCTTTTGTGCGCGTATG                     |
| T <sub>ACT1</sub> -R  | CCATTGGACCGTGTATCATATGATCATCTCTTC          |

| Names                | Description                                |
|----------------------|--------------------------------------------|
| YORW△17-UP-F         | CCTAGCACACTATCAATCTTTGCATTTTCAGC           |
| YORW△17-UP-R         | CTTGTAACATTGTCGTTGTTGTTTAACGTATTC          |
| YORW△17-D-F          | TCCGGGAAATGCGCCTTAGATTG                    |
| YORW△17-D-R          | CTGACTCACCAAGACTTAAAGAAAATGAACACG          |
| YORW△17-YZ-F         | GTTGGGATCCCATTGTGCACAAAG                   |
| YORW△17-YZ-R         | TGTTCTGAGGCAGAGGCACTTGATAATG               |
| P <sub>GPD1</sub> -F | GGTCAGTACAAACGCAACACGAAAGAAC               |
| P <sub>GPD1</sub> -R | ATTGATAATATAAAGATGTCTGCTGCTGCTGATAG        |
| ERG19-F              | ATGACCGTTTACACAGCATCCGTTACC                |
| ERG19-R              | CGAAAGACTGGTCTACCAAAGGAATAA                |
| T <sub>PGK1</sub> -F | ATTGAATTGAATTGAAATCGATAGATC                |
| T <sub>PGK1</sub> -R | GCGTATTTTAAAGTTTAACTCGAAAATTCTGCGTT        |
| ERG10-F              | ATGTCTCAGAACGTTTACATTGTATCGACTGCCAG        |
| ERG10-R              | GGTGCTTCCTCTATTGTCATTGAAAAGATATGA          |
| ERG8-F               | ATGTCAGAGTTGAGAGCCTTCAGTG                  |
| ERG8-R               | GAAAAAGATCCGGAACTTATCTTGATAAATAA           |
| YPRCτ3-UP-F          | GCAAACTCTGCAGGTCCATTGCA                    |
| YPRCτ3-UP-R          | GTGTTCCACTATCCTGTACATGTGAAATGTAT           |
| YPRCτ3-D-F           | GATGGGACGTCAGCACTGTACTTG                   |
| YPRCτ3-D-R           | TTTACAAGCGGAGCTTACTCTATATATTCATTCTTGTC     |
| YPRCτ3-YZ-F          | TTGTTGTTGAAGGGGTTTCTTAAGGTTG               |
| YPRCτ3-YZ-R          | CGGTATTACTCGAGCCCGTAATACAAC                |
| ERG12-F              | ATGTCATTACCGTTCTTAACTTCTGCACC              |
| ERG12-R              | GGAAACACGAATTTACCATGGACTTCATAA             |
| ERG13-F              | ATGAAACTCTCAACTAACTTTGTTGGTGTGG            |
| ERG13-R              | CGATGACAAATTTAGAAGATCTTACGATGTTAAAAAATAA   |
| YNRC△9-UP-F          | ACATATTGAGCAATACCTCTAGGTCCGAAGTTC          |
| YNRC△9-UP-R          | CAGTTATCAAAGTTATTGGATGTTGAATTGCAAG         |
| YNRC△9-D-F           | CAACAAGAACAATAGTATACAATCCATGAATGAAGGAG     |
| YNRC△9-D-R           | ACGCAACAGAGCATGTTATTAATCGTATATTTAAGTAAT    |
| YNRC△9-YZ-F          | CAGCAATTGTTGCGAAACAGACAAGATT               |
| YNRC△9-YZ-R          | ACCTAACTAGGATTATAATTGCAACAACAAAAGCGC       |
| YERC△8-UP-F          | CACAAGCGGAATAAGTGATACCATTTCATAAAAT         |
| YERC△8-UP-R          | TGCTTCAATGGACGATATCCCTGATATAGC             |
| YERC△8-D-F           | CGATCCTTCTTTTTTATGACTGAAGGAATCC            |
| YERC△8-D-R           | GAAAGACCTTGAGTCTGAAGGATCAAGC               |
| YERC△8-YZ-F          | GCATGTATAAATACTCTACTCCTCGTATATAGAAAGTTAAG  |
| YERC△8-YZ-R          | GACAAATGATATTTTCATTACCTCCAACGCCA           |
| DPP1-UP-F            | GTCAACACTTTTTTCAGATAGTACCTTTCAGGTGG        |
| DPP1-UP-R            | CAGAATTAAATCATAGCAAACGACCAAA               |
| DPP1-D-F             | GTCCGATGAAGGTATGTAAGAATAAAAAAG             |
| DPP1-D-R             | ATACATAGTATGTGTTAAGGGGAACGGAAAATTATTG      |
| DPP1-YZ-F            | GTCACAGGTACGGAGAGAAATTATACTTTTCG           |
| DPP1-YZ-R            | TGGCTGCTTATCCCAGCTAGACTTTC                 |
| LPP1-UP-F            | ACTGGTAAGGAAAAATTCGAAAACTACGGGAC           |
| LPP1-UP-R            | GCCTAAGGAACTCGTCATATTCTACCAAGG             |
| LPP1-D-F             | ACACTTACAGAGTCCTATCAGGAAAGAATAAAAGCCG      |
| LPP1-D-R             | CTACAAAGTATTTTCGAGAATCTTGCTTCTGCCCTT       |
| LPP1-YZ-F            | CTATATGAAAACCTTCACAGGGAGAAATAGAAGAAAATGTTT |
| LPP1-YZ-R            | TGACCTTCACCGACGGATTTCAGAGGTAAATAAGAAAG     |
| PTH1-UP-F            | CAGGGGAGAACTTATTCCTGTGC                    |
| PTH1-UP-R            | GCGTGCTCTGACTCAGTACATTTTCATAG              |
| ERG9-D-F             | ATGGGAAAGCTATTACAATTGGCATTGCA              |
| ERG9-D-R             | CCATTACCCATTTTCTCGGTGATCTCC                |

| Names                | Description                                     |
|----------------------|-------------------------------------------------|
| ERG9-YZ-F            | CTGGTACCCGTCACAATGTAGGG                         |
| ERG9-YZ-R            | TACGTAGTGACAGTACACGTCGTAGTCG                    |
| P <sub>HXT1</sub> -F | AGAAATCCTTGCAGGTCTCATCTGG                       |
| P <sub>HXT1</sub> -R | GATTTTACGTATATCAACTAGTTGACGATTA                 |
| P <sub>ERG1</sub> -F | GCGATACTGCCGTAGCGGG                             |
| P <sub>ERG1</sub> -R | TCACAGAAAAACATATCGAGAAAAAGGGTC                  |
| YPL062W-UP-F         | CTATGTGTGTATGTAAATGTACCTGTACACTCCC              |
| YPL062W-UP-R         | TGCCCCCTCACGTAAGGGCATGATA                       |
| YPL062W-D-F          | CCAGAAAGAAAAAAGAGGGTGGGCG                       |
| YPL062W-D-R          | GATAGTATGTGTTTGTGTATGTTAAAGATGTTTCTTGATG        |
| YPL062W-YZ-F         | TTGGAGAAGCAGAAGGAGGTAGACG                       |
| YPL062W-YZ-R         | ACCGTCTTGAGCTTTCATAAACTTGTTG                    |
| YNR063W-UP-F         | CAGGCCTAAGGACGCTAGAAAGAGATCTAT                  |
| YNR063W-UP-R         | TCCCCAACTGCCATAGGCTTAAGCGGT                     |
| YNR063W-D-F          | GAGGAAGTTTCACTCCAGATTACCAGGTT                   |
| YNR063W-D-R          | GTAAAGTATGCGACCCCCAAAATTCGACAAAGC               |
| YNR063W-YZ-F         | AAGTGTTGCAACAAGCAGTATGGACAGGC                   |
| YNR063W-YZ-R         | GAATAAAGTGTCAAAAAATCAGCTAGGGAACGG               |
| YJL064W-UP-F         | ATCCCTTAACTTTGGAAAGAGGTTCCAGAAG                 |
| YJL064W -UP-R        | GCCCCCTAATGAAGTTTACTCCGC                        |
| YJL064W -D-F         | TCACATCGAGCGAGCTATCCTGACG                       |
| YJL064W -D-R         | CCAGCTACCTCATAACCCACTCACATT                     |
| YJL064W -YZ-F        | CTTCGCACTTGTCAAACCTGCTTCACC                     |
| YJL064W -YZ-R        | GCAATCCGTCTTGGAAGTAGTCGACTCTC                   |
| ROX1-UP-F            | CGGTGTCTTAACTCTCCCTCTTCAC                       |
| ROX1-UP-R            | ATCTTCCTCGGTGTCAAGCTCG                          |
| ROX1-D-F             | ATCCATTATCAACAACAGCAGTCAAACACC                  |
| ROX1-D-R             | GGCGATTTAAACTTTTATTAAACAGGAGCCAAATGC            |
| ROX1-YZ-F            | GCACTATTTTCCAGTTTAAATGTTTCTTCTCa                |
| ROX1-YZ-R            | GTCTCTGGGTACTTTGTTTTAATTTTGACT                  |
| UPC2-F               | ATGAGCGAAGTCGGTATACAGAATCAC                     |
| UPC2-R               | CGATGACAACAACAAATTTCTCTGATTTTTTCGTTATGA         |
| UPC2-1-F             | TGGAGGTGGTGATATGCATATGATGCTAGATTTT              |
| UPC2-1-R             | CATCATATGCATATCACACCTCCACTGTATT                 |
| CIT2-UP-F            | ATGACAGTTCCTTATCTAAATTCAAACAGAAATGTTGC          |
| CIT2-UP-R            | GTCAAGATCGGAACCTACCTAGTCATGTC                   |
| CIT2-D-F             | AATGATGACTACTCTAAAGATACGATCGAAAA                |
| CIT2-D-R             | CTATAGTTTGCTTTCAATGTTTTTGACCAATTCCTTGT          |
| CIT2-YZ-F            | AGGCACAGCGGAAAAACAATAACAATGGTAAGCGCAATTACCTTTTG |
| CIT2-YZ-R            | CGTGTGTACCTAGTTATCGCGTGATAGCTTCCGCAATTTTCCAAC   |
| MLS1-UP-F            | ATGGTTAAGGTCAGTTTGGATAACGTCA                    |
| MLS1-UP-R            | TGATTTTGAAGATTACAGCTTCACCTACTTGGAAC             |
| MLS1-D-F             | GGTGAGATTACTACCGAGGGAATTG                       |
| MLS1-D-R             | TCACAATTGCTCAAATCAGTGGGC                        |
| MLS1-YZ-F            | CCTGGCTACCGATTAACTCATCTTCTTG                    |
| MLS1-YZ-R            | CGTCGACCGTGATACATTAATCTGGCCAA                   |
| XI-3-UP-F            | AGGTTAGTTACTTGCTCTATGCGTTTGC                    |
| XI-3-UP-R            | CGTATGGGGGTATGATGGTTAGATGGC                     |
| XI-3-D-F             | CGTGGATTGAGCCAGCAATACAGATC                      |
| XI-3-D-R             | CGTAATAAGGATAGGACAGGAGCGATAGG                   |
| XI-3-YZ-F            | CTGTTATTAGTTTGGCGTTTTGCCTGAC                    |
| XI-3-YZ-R            | GCAGATAATGCATGCAGTGGTGTTTTGAT                   |
| ADH2-F               | CTTTTTGAGTTTCTGGAATAGACAT                       |
| ADH2-R               | TTATTTAGAAGTGTCAACAACGTATCTACCAGCA              |
| YORW△22-UP-F         | CACCGGAGCTTGGATATGATAAACGAAATATTC               |
| YORW△22-UP-R         | CGTTCGTAAAAACACATATGAAACAACCTTTATAACA           |

| Names        | Description                              |
|--------------|------------------------------------------|
| YORW△22-D-F  | GGACCAACTATCATCCGCTAATTACTGACATTAC       |
| YORW△22-D-R  | AATGGTTAAAATTTCAGAGGAACCTTCGACGTA        |
| YORW△22-YZ-F | GTATGCTCCATCGCTACGAGATGTTAGCAG           |
| YORW△22-YZ-R | CCTGTTAGTTATGGCGATCGTTTATCACG            |
| ACS2-F       | TTCCGAATTGTGTGTCTCCGCGGTTAG              |
| ACS2-R       | GTATTTTCGCTTTCCTAGCTGACCAG               |
| YPRC△15-UP-F | CTGCATACTCACTATCGTAAACTGTCCTGCAAATCGTG   |
| YPRC△15-UP-R | CGCGAATGCAAGACAGAAGTCCAAATC              |
| YPRC△15-D-F  | GGAAGGTCGGGATGAGCATATACAAGC              |
| YPRC△15-D-R  | TCCACCTTTCAGTTAGATTCAGGCCTC              |
| YPRC△15-YZ-F | GATAACTAGCATCTATTACTATCCGATAACGCCAG      |
| YPRC△15-YZ-R | ATAAAGCAGCCGCTACCAAACAGACA               |
| P-SeACS-T-F  | CCATGATTACGCCAAGCGCGCAATTAAC             |
| P-SeACS-T-R  | CCGGTACCCAATTTCGCCCTATAGTGAGT            |
| NDT80-UP-F   | GAGTACCTGGACGTTTATGCTTTATCCATCAAGC       |
| NDT80-UP-R   | GCTTAAATAGGTGACACAAAATGGAGGGC            |
| NDT80-D-F    | GGATCGAACACAGGACCTCCAGATAA               |
| NDT80-D-R    | GCGAGTATTTTCATACAGTACTGAAGCCG            |
| NDT80-YZ-F   | AATCGTCTTTGCCCTATTTGGCTTG                |
| NDT80-YZ-R   | GATGTTCCCTATTACAGCAGTGTCAGCC             |
| PK-F         | ATGACATCCCCTGTAATTGGTACTCCTTGG           |
| PK-R         | CTGCTACCGCTGGTGACAACGAATAA               |
| PTA-F        | GCTTTAGCCAAACCAAAAATATTTTCCATCAATTCAT    |
| PTA-R        | TTAACCTTGAGCTTGAGCTTGAACAGC              |
| X-2-UP-F     | GCTACTGGCAACTGTTGAATATTTAATGTTAAAACAAACT |
| X-2-UP-R     | TGACCACTTCGAGAGCAAGTTGC                  |
| X-2-D-F      | GGTAATGCCTTGCGGAGAATTTTCGATTTTC          |
| X-2-D-R      | GCATTCAAAAAGTGATTTCAAACCTCATATGGATCAGT   |
| X-2-YZ-F     | CGTCTATGAGGAGACTGTTAGTTGGATATCAGT        |
| X-2-YZ-R     | ATTTATTAACACCTACGGGAACGGGGC              |
| YHRC△14-UP-F | GCAATGTGAATATACTGCAACTTGTCAGCC           |
| YHRC△14-UP-R | CGCTGGTACCAGTTATGAACCCCTATCAA            |
| YHRC△14-D-F  | CCAGTAGGCTTTATCGTAAAATCCTCGAACTTG        |
| YHRC△14-D-R  | GCAGAGGGCGTAAAAGTGCACCAAAAAT             |
| YHRC△14-YZ-F | GCTTTATTGTGCTGTTTGACATAGTATACACAGCAG     |
| YHRC△14-YZ-R | GCCACACGCAGTACTTGAAACTTGAAATAATG         |
| XI-2-UP-F    | CAATTACAATAGACCCTTGTTGGGGTTTCTG          |
| XI-2-UP-R    | GGGGTGAACCATCAGAAAGCTTATTA               |
| XI-2-D-F     | CTTTGCAGTTTTTCGTGGCTAGACTTAGAA           |
| XI-2-D-R     | CCCTGTGCCCTTCTATTTTATGGTTGAA             |
| XI-2-YZ-F    | ATTTTCGATGGAGCAGGATGAGGAGAAATAG          |
| XI-2-YZ-R    | AAGATTCCGCTCTACCAGGGAAAAACA              |
| X-4-UP-F     | GCCCAAAGCTAAGAGTCCCATTTTATTCTTCTATATG    |
| X-4-UP-R     | GGTTTTTCAGTGAGCCGACTCTACTACA             |
| X-4-D-F      | TGTCTGCAAGAAGTAACAGGCGTGT                |
| X-4-D-R      | AGCTGTTCACTACTATCTTCTGGTGAGG             |
| X-4-YZ-F     | GGGTCATTGTCTCTTTTACCAGCAGCTT             |
| X-4-YZ-R     | CTATGTCTGAATTCTGTGCATTGCAACCGA           |
| XI-1-UP-F    | TACGCTGCGGTGAATTTGACCAGA                 |
| XI-1-UP-R    | TTACTTGCGTGGCTTCAAATTTGATATCAGC          |
| XI-1-D-F     | GGAATACCAAGCCCATTCATCG                   |
| XI-1-D-R     | GCCGAGGCCTTATTTACACTTAGGGAAA             |
| XI-1-YZ-F    | ATCACTGTCAAGTTCGTTGTAATTTGGTAGAAG        |
| XI-1-YZ-R    | AGGTCAATGGTAGATATAGCCGCCCA               |

| Names       | Description                                |
|-------------|--------------------------------------------|
| YARC△8-UP-F | CGAACAGTATCAAAATAAAGTTTTTGATTAGGGCC        |
| YARC△8-UP-R | GGACAGTATATTAAATAGAAGAGGAAATAATGGTATTTTCAC |
| YARC△8-D-F  | GCTCTCTTCTATGTGATGCTACAACGGA               |
| YARC△8-D-R  | AAATCTTGTAATCTTTCAACGCTGCTTTTC             |
| YARC△8-YZ-F | TCGAGGATTTTACGATAAAGCCTACTGGTTAT           |
| YARC△8-YZ-R | ACTTTTGGCAACTCATGTTACTAAGTCGAG             |

**Table S2.** Exogenous gene sequences used in this study.

| Names                                   | Sequences                                                                                                                                                                                                                                                                                                                                                                                                                                                                                                                                                                                                                                                                                                                                                                                                                                                                                                                                                                                                                                                                                                                                                                                                                                                                                                                                                                                                                                                                                                                                                                                                                                                                                                                                                                                                                                 |
|-----------------------------------------|-------------------------------------------------------------------------------------------------------------------------------------------------------------------------------------------------------------------------------------------------------------------------------------------------------------------------------------------------------------------------------------------------------------------------------------------------------------------------------------------------------------------------------------------------------------------------------------------------------------------------------------------------------------------------------------------------------------------------------------------------------------------------------------------------------------------------------------------------------------------------------------------------------------------------------------------------------------------------------------------------------------------------------------------------------------------------------------------------------------------------------------------------------------------------------------------------------------------------------------------------------------------------------------------------------------------------------------------------------------------------------------------------------------------------------------------------------------------------------------------------------------------------------------------------------------------------------------------------------------------------------------------------------------------------------------------------------------------------------------------------------------------------------------------------------------------------------------------|
| <i>PTS</i>                              | ATGGAATTGTATGCTCAATCTGTTGGTGTGGTGCTGCTTCTAGACCATTGGCTAAT<br>TTTCATCCATGTGTTTTGGGGTGATAAATTTATTGTTTTATAATCCACAATCTTGTC<br>GCTGGTGAAAGAGAAGAAGCTGAGGAATTGAAAGTTGAATTGAAAAGAGAGTT<br>GAAAGAAGCTTCTGATAACTACATGAGACAATTGAAAATGGTTGATGCTATTCAA<br>AGATTGGGTATCGATTATTTGTTTGTGGAAGATGTTGATGAAGCTTTGAAAACTT<br>GTTCGAAATGTTTGATGCTTTTGC AAAAATAATCATGATATGCATGCTACTGCTTT<br>GTCTTTTAGATTGTTGAGACAACATGGATATAGAGTTTCATGTGAAGTTTTTGAGA<br>AGTTTAAAGATGGTAAAGATGGTTTTAAAGTTCCAAATGAAGATGGTGCTGTTGC<br>TGTTTTGGAATTTTTTGAAGCTACTCATTGAGAGTTTCATGGAGAGGATGTCTTGG<br>ATAATGCTTTTGATTTTACTAGAACTACTTGGAATCTGTTTATGCTACTTTGAATG<br>ATCCAAC TGCTAAACAAGTTCCATAATGCTTTGAATGAATTTCTTTTAGAAGAGGT<br>TTGCCAAGGGTCGAAGCAAGAAAATATATTTCTATTTATGAACAATATGCTTCTCAT<br>CATAAAGGTTTGTTGAAATTGGCAAAGTTGGATTTTAATTTGGTTCAAGCTTTGCA<br>TAGAAGAGAATTGTCTGAAGATTCTAGATGGTGGAAACTTTGCAAGTTCCAAC<br>AAATTGTCTTTTGTTAGAGATAGATTGGTTGAATCTTATTTTTGGGCTTCTGGTTCT<br>TATTTTGAACCAAATTATTCTGTTGCTAGAATGATTTTGGCTAAAGGTTTGGCTGTT<br>TTGTCTTTGATGGATGATGTTTATGATGCTTATGGTACTTTTGAAGAATTGCAAATG<br>TTTACTGATGCTATTGAAAGATGGGATGCTTCTTGTGTTGGATAAATTGCCTGATTAC<br>ATGAAAATTGTTTATAAAGCATTGTTGGATGTTTTTGAAGAAGTTGATGAAGAATT<br>GATTAAATTGGGTGCTCCATATAGAGCTTATTATGGTAAAGAAGCTATGAAATATGC<br>TGCTAGAGCTTACATGGAAGAAGCTCAATGGAGAGAGACAAAAACATAAACCAAC<br>TACAAAGGAATATATGAAATTGGCTACTAAACTTGTGGTTACATTACTTTGATCAT<br>TTTGTCATGTTGGGTGTTGAAGAAGGTATTGTTACTAAAGAAGCTTTTGATTGGG<br>TTTTTTCTAGACCACCTTTTATTGAAGCTACTTTAATTATTGCAAGGTTGGTTAATG<br>ACATTACTGGTCATGAATTCGAAAAAAAAAAGAGAACATGTTAGAAGCTGCTGTTGA<br>ATGTTATATGGAAGAACATAAGGTTGGTAAGCAAGAAGTTGTTTCAGAATTTTATA<br>ATCAAATGGAATCTGCTTGGAAGATATTAATGAAGGTTTTTTGAGGCCTGTTGAG<br>TTCCCAATTCCTTTGTTATATTTAATCTTGAATTCTGTTAGGACTTTGGAAGTTATTT<br>ATAAAGAAGGTGATTCTTACACTCACGTTGGTCCTGCTATGCAGAATATTATTA<br>CAGTTGTATTTGCATCCTGTTCCATATTA |
| <i>SeACS<sup>L6</sup><sub>41P</sub></i> | ATGTCTCAAAC TCATAACATGCTATTCTGCTAATATCGCAGATAGATGCTTGATT<br>AACCTGAACAATATGAAACAAAATATAAGCAATCTATTAATGATCCTGATACTTTT<br>TGGGGTGAACAAGGTAAAATTTGGATTGGATTACTCCATATCAAAAAGTTAAAAA<br>TACTTCTTTTGCTCCTGGTAATGTTTCTATTAAATGGTATGAAGATGGTACTTTGAA<br>TTTGGCTGCTAATTGTTTGGATAGACATTTGCAAGAAAATGGTGATAGAAGCTGCTA<br>TTATTTGGGAGGGTGATGATACTTCTCAATCTAAACATATCTCATATAGAGAATTGC<br>ATAGAGATGTTTGTAGATTTGCTAATACTTTGTTGGATTGGGTATTAAAAAAGGTG<br>ATGTTGTTGCTATTTATATGCCAATGGTTCCTGAAGCTGCTGTTGCTATGTTGGCTT<br>GTGCTAGAATTGGTGCTGTTTCATTCTGTTATTTTTGGTGGTTTTTCTCCTGAAGCTG<br>TTGCTGGTAGAATTATTGATTCTTCATCTAGATTGGTTATTACTGCTGATGAAGGTG<br>TTAGAGCTGGTAGATCTATTCCATTGAAAAAAAAATGTTGATGATGCTTTGAAAAAT<br>CCAAATGTTACTTCTGTTGAACATGTTATTGTTTTGAAAAGAAGCTGGTTCTGATATT<br>GATTGGCAAGAAGGTAGAGATTGTGGTGGAGAGATTGATTGAAAAAGCTTCTC<br>CTGAACATCAACCTGAAGCTATGAATGCTGAAGATCCATTGTTTATTTTGATACAT<br>CTGGATCTACTGGTAAACCAAAAGGTGTTTTGCATACTACTGGTGGTTATTTGGTT<br>TATGCTGCTACAACATTCAAATATGTTTTTGAATTATCATCCTGGTGATATTATTGGT<br>GTACTGCTGATGTTGGTTGGGTTACTGGTCATTCTTATTTGTTGTATGGACCATTAG<br>CTTGTGGTGCAACAACCTTTGATGTTTGAAGGTGTTCCAAATTGGCCAACTCCTGCT<br>AGAATGTGTCAAGTTGTTGATAAACATCAAGTTAATATTTTATATACTGCTCCAAC<br>GCTATTAGAGCTTTGATGGCTGAAGGTGATAAAGCTATTGAAGGTACTGATAGATC<br>TTCTTTGAGAATTTTGGGTTCTGTTGGTGAACCAATTAATCCTGAAGCTTGGGAAT<br>GGTATTGGAAAAAAATTGGTAAAGAAAAATGTCCTGTTGTTGATACTTGGTGGCA<br>AACTGAAACTGGTGGTTTTATGATTACTCCATTGCCTGGTGCTATTGAATTGAAAG<br>CTGGTTCTGCTACTAGACCATTTTTTGGTGTTCAACCTGCTTTGGTTGATAATGAA<br>GGTCATCCACAAGAAGGTGCTACTGAAGGTAATTTGGTTATCACAGATTCTTGGCC                                                                                                                                                                                                                                                                         |

|            |                                                                                                                                                                                                                                                                                                                                                                                                                                                                                                                                                                                                                                                                                                                                                                                                                                                                                                                                                                                                                                                                                                                                                                                                                                                                                                                                                                                                                                                                                                                                                                                                                                                                                                                                                                                                                                                                                                                                                                                                                                                                                                                                                                                                                                                                                                                                                                                                                                                                                                                                                                                                                                                                                                                                                                                                                                                                  |
|------------|------------------------------------------------------------------------------------------------------------------------------------------------------------------------------------------------------------------------------------------------------------------------------------------------------------------------------------------------------------------------------------------------------------------------------------------------------------------------------------------------------------------------------------------------------------------------------------------------------------------------------------------------------------------------------------------------------------------------------------------------------------------------------------------------------------------------------------------------------------------------------------------------------------------------------------------------------------------------------------------------------------------------------------------------------------------------------------------------------------------------------------------------------------------------------------------------------------------------------------------------------------------------------------------------------------------------------------------------------------------------------------------------------------------------------------------------------------------------------------------------------------------------------------------------------------------------------------------------------------------------------------------------------------------------------------------------------------------------------------------------------------------------------------------------------------------------------------------------------------------------------------------------------------------------------------------------------------------------------------------------------------------------------------------------------------------------------------------------------------------------------------------------------------------------------------------------------------------------------------------------------------------------------------------------------------------------------------------------------------------------------------------------------------------------------------------------------------------------------------------------------------------------------------------------------------------------------------------------------------------------------------------------------------------------------------------------------------------------------------------------------------------------------------------------------------------------------------------------------------------|
|            | <p> TGGTCAAGCTAGAACTTTGTTTTGGTGATCATGAAAGATTCTGAACAGACTTATTTTT<br/> CTACATTCAAAAATATGTATTTTTCTGGTGATGGTGCTAGAAGAGATGAAGATGGT<br/> TATTATTGGATTACTGGTAGAGTTGATGATGTTTTGAATGTTTCTGGTCATAGATTG<br/> GGTACTGCTGAAATTGAATCTGCTTTGGTTGCTCATCCAAAAATTGCTGAAGCAG<br/> CTGTTGTTGGTATTCCACATGCTATTAAAGGTCAAGCTATTTATGCTTATGTTACTTT<br/> GAATCATGGTGAAGAACCATCTCCTGAATTGTATGCTGAAGTTAGAAATTGGGTTA<br/> GAAAAGAAATTGGACCTTTGGCTACTCCTGATGTTTTGCATTGGACTGATTCTTTG<br/> CCAAAACTAGATCTGGTAAAATTATGAGAAGAATTTTGAGAAAAATTGCTGCTG<br/> GTGATACTTCTAATTTGGGAGACACTTCTACTTTGGCTGATCCTGGTGTGTTGAA<br/> AAACCATTGGAAGAAAAACAAGCTATTGCTATGCCATCTTAA </p>                                                                                                                                                                                                                                                                                                                                                                                                                                                                                                                                                                                                                                                                                                                                                                                                                                                                                                                                                                                                                                                                                                                                                                                                                                                                                                                                                                                                                                                                                                                                                                                                                                                                                                                                                                                                                                                                                                                                                                                                                                                                                                                                                                                                                               |
| <i>PK</i>  | <p> ATGACATCCCCTGTAATTGGTACTCCTTGGAAGAAGTTGAACGCCCCAGTCTCAG<br/> AAGAAGCATTGGAAGGTGTTGATAAGTATTGGAGAGTTGCAAATTACTTGTCAT<br/> TGGTCAAATTTACTTGAGATCAAATCCATTGATGAAAGAACCATTCACTAGAGAA<br/> GATGTTAAACATAGATTGGTTGGTCATTGGGGTACAACCTCAGGTTTAAATTTCTT<br/> GATTGGTCATATTAATAGATTCATTGCTGATCATGGTCAAATACAGTTATTATTATG<br/> GGTCCAGGTCATGGTGGTCCAGCTGGTACTTCACAATCTTACTTGGATGGTACTTA<br/> TACAGAACTTTTCCAAAAATTACTAAAGATGAAGCAGGTTTGCAAAAAATTTTTC<br/> AGACAATTTTCTTATCCAGGTGGTATTCCATCTCATTTTGCACCAGAAACACCAGG<br/> TTCAATTCATGAAGGTGGTGAATTGGGTACGCTTTGTCTCATGCTTATGGTGCAA<br/> TTATGGATAATCCATCTTTGTTTGTTCAGCTATTGTTGGTGACGGTGAAGCTGAA<br/> ACTGGTCCATTGGCTACTGGTTGGCAATCAAATAAGTTGGTTAATCCAAGAACTGA<br/> TGGTATTGTTTTACCAATTTTGCATTTGAATGGTTACAAAATTGCTAATCCAACAAT<br/> TTTATCAAGAATTTCTGATGAAGAATTGCATGAATTTTCCATGGTATGGGTTACGA<br/> ACCATACGAATTTGTTGCAGGTTTTGATGATGAAGATCATATGTCAATTCATAGAA<br/> GATTTGCTGAATTATGGGAAACAATTTGGGATGAAATTTGTGATATTAAAGCAACA<br/> GCTCAAACCTGATAATGTTTCATAGACCATTTTATCCAATGTTGATTTTGAACACCA<br/> AAAGGTTGGACTTGTCCAAAATATATTGATGGTAAAAAGACTGAAGGTTTCATGGA<br/> GATCACATCAAGTTCCATTAGCATCTGCTAGAGATACTGAAGCACATTTTGAAGTT<br/> TTGAAAAATTGGTTGGAATCTTATAAACCAGAAGAATTGTTTGATGCAAATGGTG<br/> AGTTAAAGATGATGTTTTAGCTTTTATGCCAAAAGGTGAATTGAGAATTGGTGCTA<br/> ATCCAAATGCTAATGGTGGTGTTATTAGAAATGATTTGAAATTACCAAATTTGGAA<br/> GATTACGAAGTTAAAGAAGTTGCAGAATACGGTCATGGTTGGGGTCAATTGGAAG<br/> CTACTAGAACTTTAGGTGCTTATACTAGAGATATTATTAATAAATAATCCAAGAGATT<br/> TTAGAATTTTGGTCCAGATGAACTGCTTCTAATAGATTGCAAGCATCTTATGAA<br/> GTTACTAATAAGCAATGGGATGCTGGTTATATTTTCAAGATGAAGTTGATGAACATATG<br/> CATGTTTTCAGGTCAAGTTGTTGAACAATTGTCAGAACATCAAATGGAAGGTTTCT<br/> TGGAAGCATACTTGTAAACAGGTAGACATGGTATTTGGTCATCTTATGAATCTTTTG<br/> TTCATGTTATTGATTCAATGTTAAATCAACATGCAAAATGGTTGGAAGCTACAGTT<br/> AGAGAAATTCCATGGAGAAAACCAATTGCATCTATGAATTTGTTAGTTTCTTCACA<br/> TGTTTGGAGACAAGATCATAATGGTTTTTCACATCAAGATCCAGGTGTTACTTCTG<br/> TTTTGTTGAATAAGTGTTTTTATAATGATCATGTTATTGGTATTTACTTTGCAACTGA<br/> TGCTAATATGTTGTTAGCTATTGCTGAAAAATGTTACAAATCAACTAATAAGATTAA<br/> TGCAATTATTGCTGGTAAACAACCAGCAGCTACTTGGTTAACATTGGATGAAGCTA<br/> GAGCAGAATTAGAAAAAGGTGCAGCTGCTTGGGATTGGGCATCTACTGCTAAAAA<br/> TAATGATGAAGCTGAAGTTGTTTTAGCAGCAGCTGGTGACGTTCCAACCTCAAGAA<br/> ATTATGGCAGCTTCAGATAAATTGAAAGAATTGGGTATTAAATTCAAAGTTGTTAA<br/> TGTTGCAGATTTGTTATCATTGCAATCTGCTAAAGAAAAATGATGAAGCATTAACTG<br/> ATGAAGAATTTGCTGATATTTTACAGCTGATAAACCAGTTTTATTTGCTTACCATT<br/> CTTATGCTCATGATGTTAGAGGTTTGATTTACGATAGACCAAATCATGATAATTTTA<br/> ATGTTTCATGGTTATGAAGAAGAAGGTTCAACTACAACCTCCATACGATATGGTTAGA<br/> GTTAATAGAATTGATAGATACGAATTGACTGCTGAAGCATTGAGAATGATTGATGC<br/> AGATAAATACGCAGATAAAATTGATGAATTGGAAAAATTCAGAGATGAAGCATTTTC<br/> AATTTGCAGTTGATAATGGTTATGATCATCCAGATTATACAGATTGGGTTTACTCAG<br/> GTGTAATAACCGACAAAAAGGGTGCTGTAACCGCTACCGCTGCTACCGCTGGTGA<br/> CAACGAATAA </p> |
| <i>PTA</i> | <p> ATGAAATTGATGGAAAATATTTTTGGTTTGGCTAAAGCTGATAAAAAGAAAATTGT<br/> TTTGGCTGAAGGTGAAGAGGAAAGAAATATTAGAGCTTCTGAAGAAATTATTAGA </p>                                                                                                                                                                                                                                                                                                                                                                                                                                                                                                                                                                                                                                                                                                                                                                                                                                                                                                                                                                                                                                                                                                                                                                                                                                                                                                                                                                                                                                                                                                                                                                                                                                                                                                                                                                                                                                                                                                                                                                                                                                                                                                                                                                                                                                                                                                                                                                                                                                                                                                                                                                                                                                                                                                                                   |

|  |                                                                                                                                                                                                                                                                                                                                                                                                                                                                                                                                                                                                                                                                                                                                                                                                                                                                                                                                                                                      |
|--|--------------------------------------------------------------------------------------------------------------------------------------------------------------------------------------------------------------------------------------------------------------------------------------------------------------------------------------------------------------------------------------------------------------------------------------------------------------------------------------------------------------------------------------------------------------------------------------------------------------------------------------------------------------------------------------------------------------------------------------------------------------------------------------------------------------------------------------------------------------------------------------------------------------------------------------------------------------------------------------|
|  | GATGGTATTGCTGATATTATTTTGGTTGGTTCTGAATCTGTTATTAAAGAAAATGCT<br>GCTAAATTTGGTGTTAATTTGGCTGGTGTTGAAATCGTTGATCCTGAAACTTCTTCT<br>AAAAGCTGCTGGATATGCTAACGCTTTTTATGAAATTAGAAAAACAAAGGTGTCA<br>CTTTGGAAAAAGCAGATAAAATTGTTAGAGATCCAATTTATTTTGCTACTATGATG<br>GTTAAATTGGGTGATGCTGATGGTTTGGTTTCTGGTGCTATTCATACTACTGGTGAT<br>TTGTTGAGACCTGGTTTGC AAATTGTTAAAGCTGTTCTGGTGCTTCTGTTGTTTC<br>TTCTGTTTTTTTGATGTCTGTTCTGATTGTGAATATGGTGAAGATGGTTTTTTGTT<br>GTTTGCTGATTGTGCTGTTAATGTTTGTCCAAGCTGCTGAAGAATTGTCTTCTATTGC<br>TATTACTACTGCTGAAAGCTGCTAAAAATTTGTGTAAAGCTGAACCAAGAGTTGCTA<br>TGTTGTCTTTTTCTACTATGGGTTCTGCTTCTCATGAATTGGTTGATAAAGTTACTA<br>AAGCTACTAAATTGGCTAAAGAAGCTAGACCTGATTTGGATATTGATGGTGAATTG<br>CAATTGGATGCTTCTTTGGTTAAAAAGTTGCTGATTTGAAAGCTCCTGGTTCTAA<br>AGTTGCTGGTAAAGCTAATGTTTTGATTTTCTGATATTCAAGCTGGTAATATTGG<br>TTATAAATTGGTTCAAAGATTTGCTAAAGCTGAAGCTATTGGTCCAATTTGTCAAG<br>GTTTTGCTAAACCAATTAATGATTTGTCTAGAGGTTGTTCTGTTGATGATATTGTTA<br>AAGTTGTTGCTGTTACTGCTGTTCAAGCTCAAGCTCAAGGTAA |
|--|--------------------------------------------------------------------------------------------------------------------------------------------------------------------------------------------------------------------------------------------------------------------------------------------------------------------------------------------------------------------------------------------------------------------------------------------------------------------------------------------------------------------------------------------------------------------------------------------------------------------------------------------------------------------------------------------------------------------------------------------------------------------------------------------------------------------------------------------------------------------------------------------------------------------------------------------------------------------------------------|



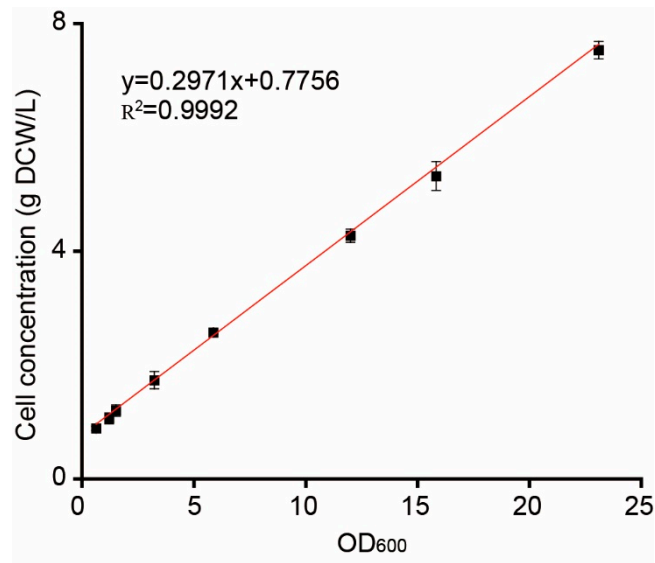

Figure S1: The relationship between cell dry weight and OD<sub>600</sub>, y is the cell concentration, unit g DCW/L, x is OD<sub>600</sub>.

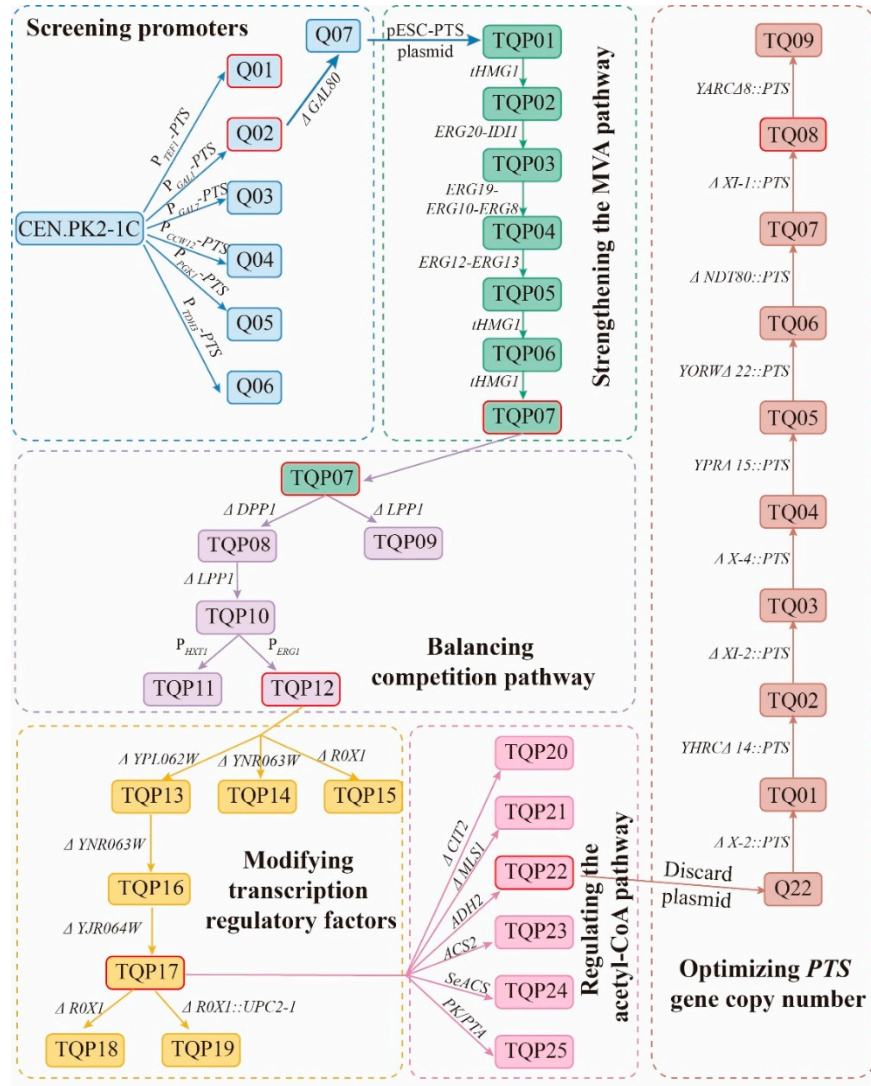

Figure S2. Schematic diagram of strain construction. “ $\Delta$ ” indicates knocking out; “ $\Delta A:: B$ ” indicates overexpression of B gene at site A.
